# Supplementary material for: Design of a novel Schiff-base fluorescent sensor for Al3+: experimental and computational studies
Source: Royal Society of Chemistry journal article supplement (doi:10.1039/c5ay01160d), 2015-01-01
Supplement: c5ay01160d1.pdf [file c5ay01160d1.pdf]

## **Design of a novel Schiff-base fluorescent sensor for Al<sup>3+</sup>: experimental and computational studies**

Jing-Can Qin<sup>1</sup>, Xiao-ying Cheng<sup>1</sup>, Kai-chao Yu<sup>2</sup>, Ran Fang<sup>1</sup>, Ming-fang Wang<sup>1</sup>,  
Zheng-yin Yang\*<sup>1</sup>

<sup>1</sup>State Key Laboratory of Applied Organic Chemistry, College of Chemistry and  
Chemical Engineering, Lanzhou University, Lanzhou 730000, PR China

<sup>2</sup>Hubei Key Laboratory of Bioinorganic Chemistry & Materia Medica, School of  
Chemistry and Chemical Engineering, Huazhong University of Science and  
Technology, Wuhan 430074, PR China

\*\* Corresponding author. Tel.: +86 931 8913515; Fax: +86 931 8912582; e-mail:  
[yangzy@lzu.edu.cn](mailto:yangzy@lzu.edu.cn) (Z.Y. Yang)

**Fig. S1** The <sup>1</sup>H NMR of HL.

**Fig. S2** The IR spectra of HL

**Fig. S3** the binding constant is based on the fluorescence titration data

**Fig. S4.** The detection limit of HL

**Fig. S5.** The ESI-MS spectra of L- Al.

**Fig. S6.** The IR spectra of L- Al.

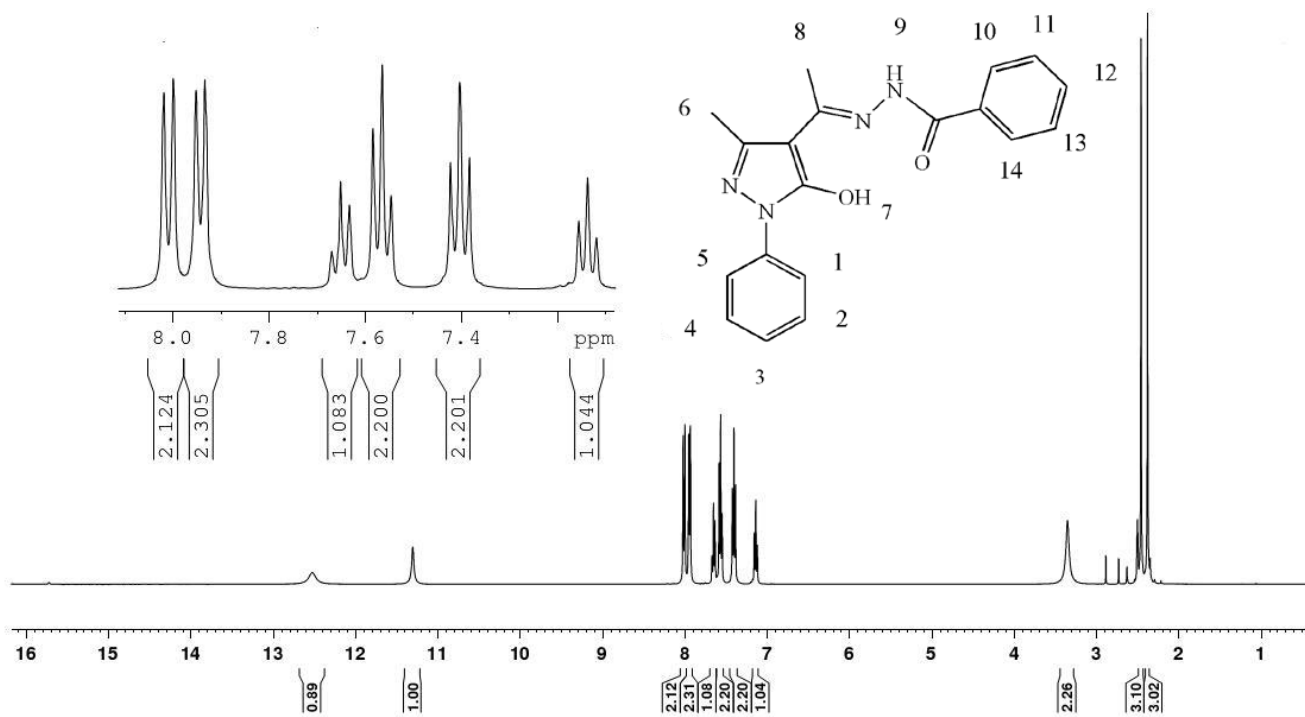

**Fig. S1** The <sup>1</sup>H NMR of HL

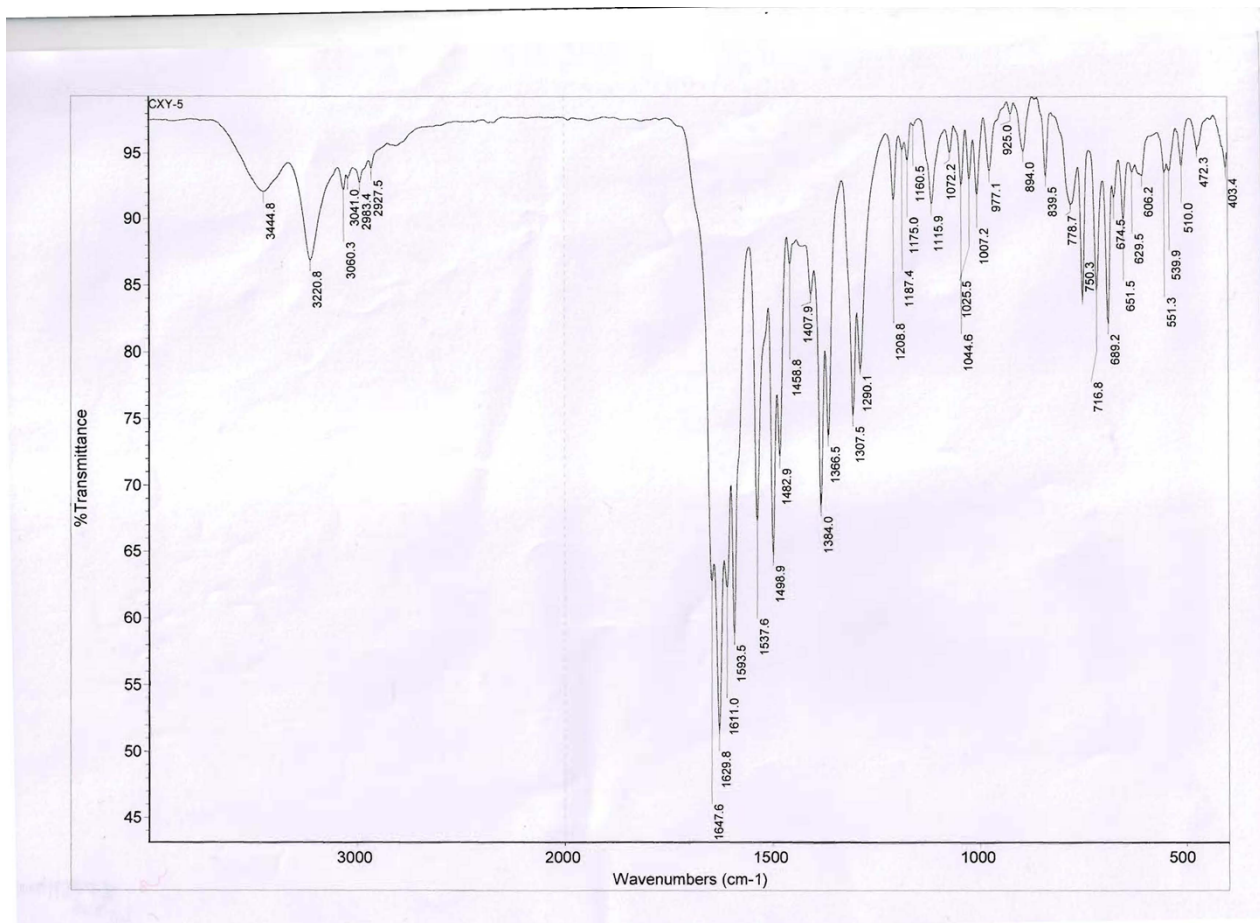

**Fig. S2.** The IR of HL

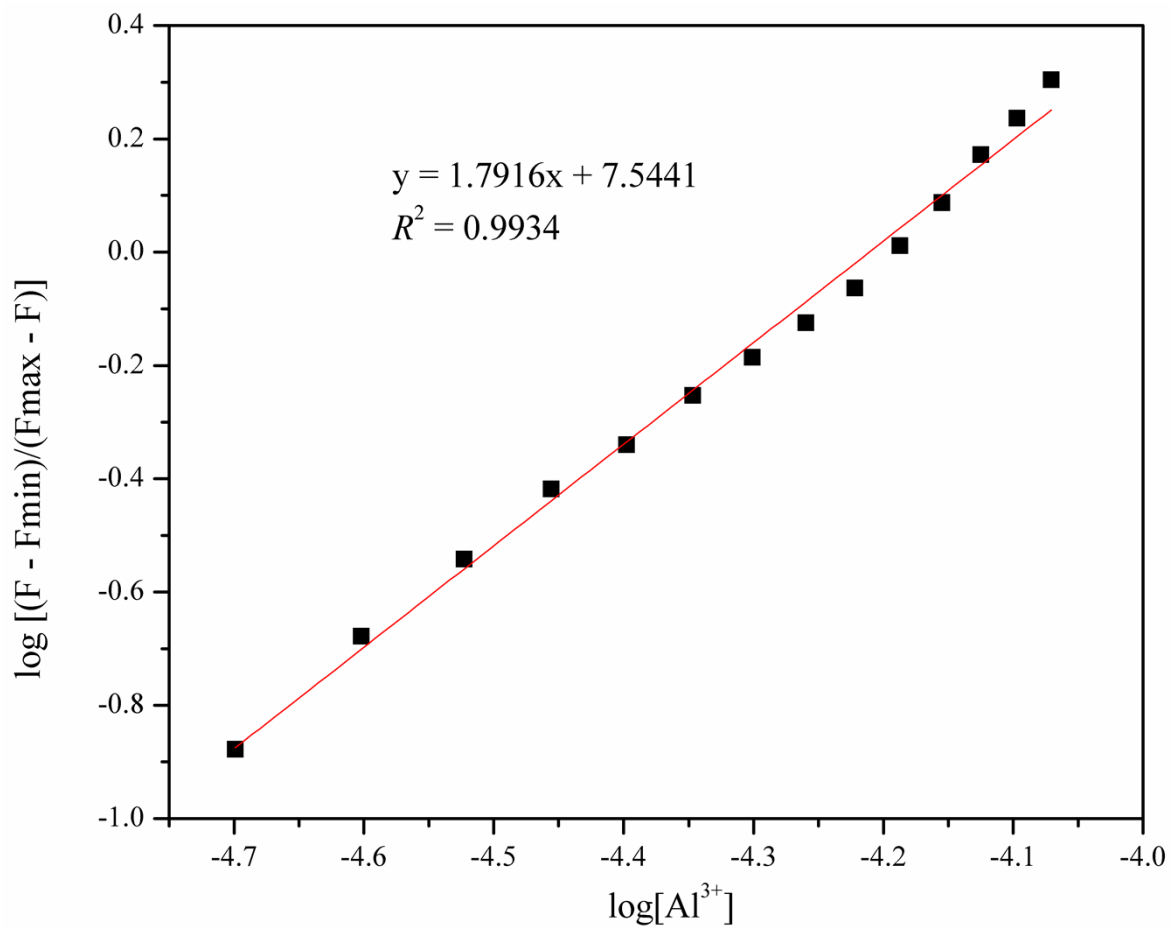

**Fig. S3** the binding constant is based on the fluorescence titration data

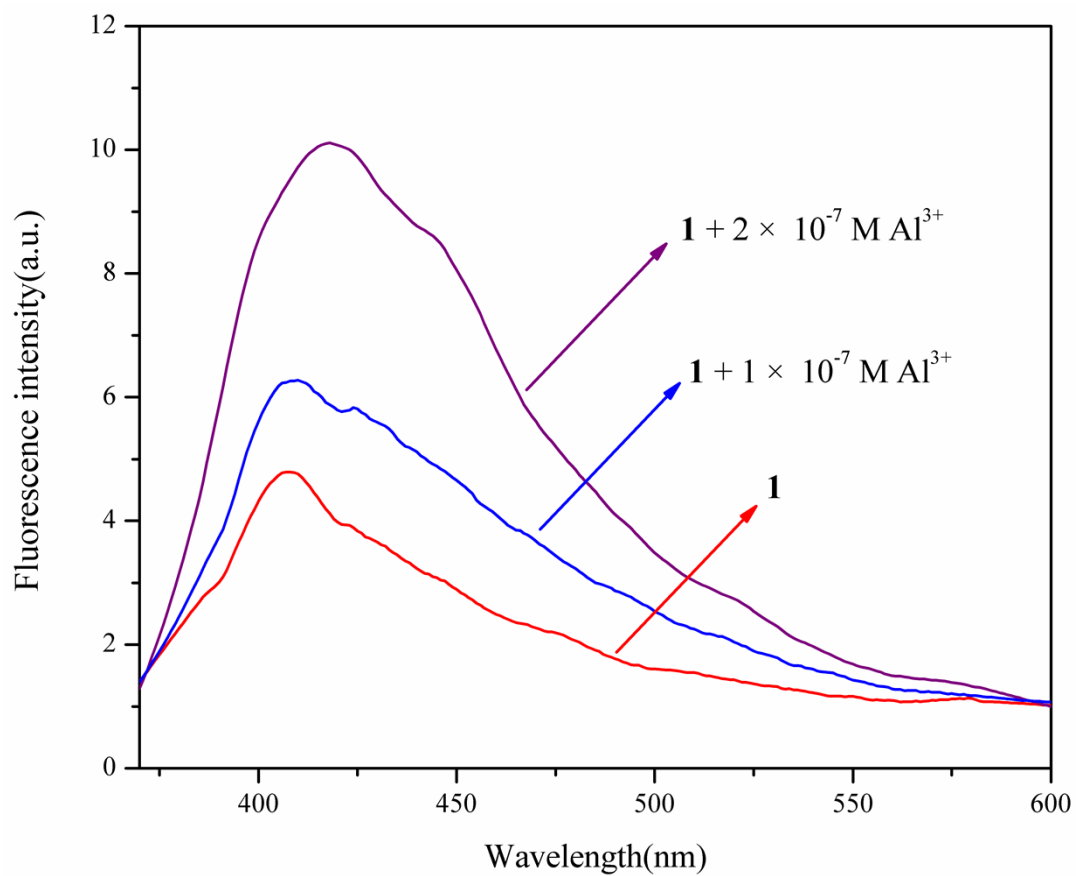

**Fig. S4.** The detection limit of HL

## Generic Display Report

### Analysis Info

Analysis Name D:\Data\YANGY\_MS\New\CHENGXIAOYING121102.d  
Method LOWmass.m  
Sample Name default  
Comment

Acquisition Date 11/2/2012 16:53:26

Operator ESQ6K  
Instrument esquire6000

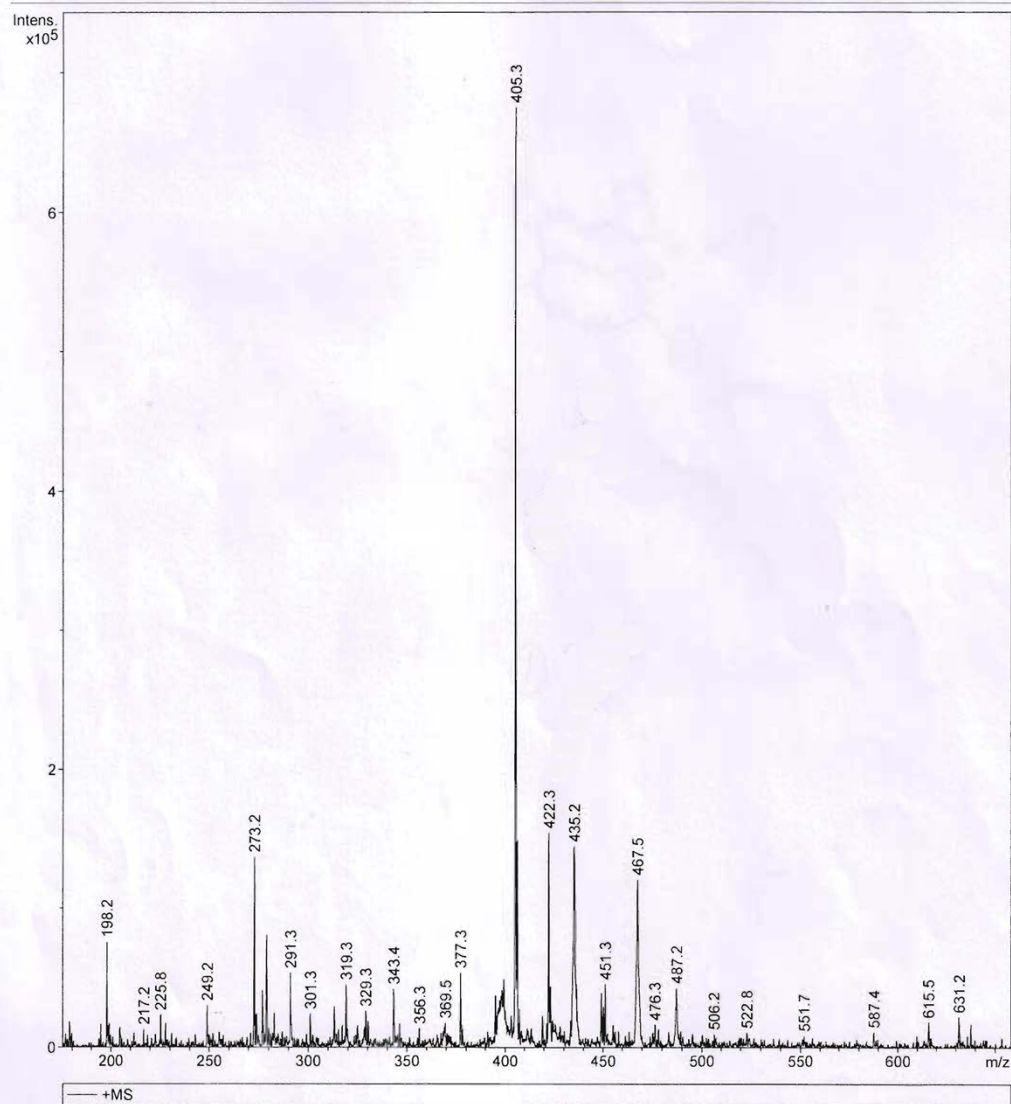

**Fig. S5.** The ESI-MS spectra of L- Al.

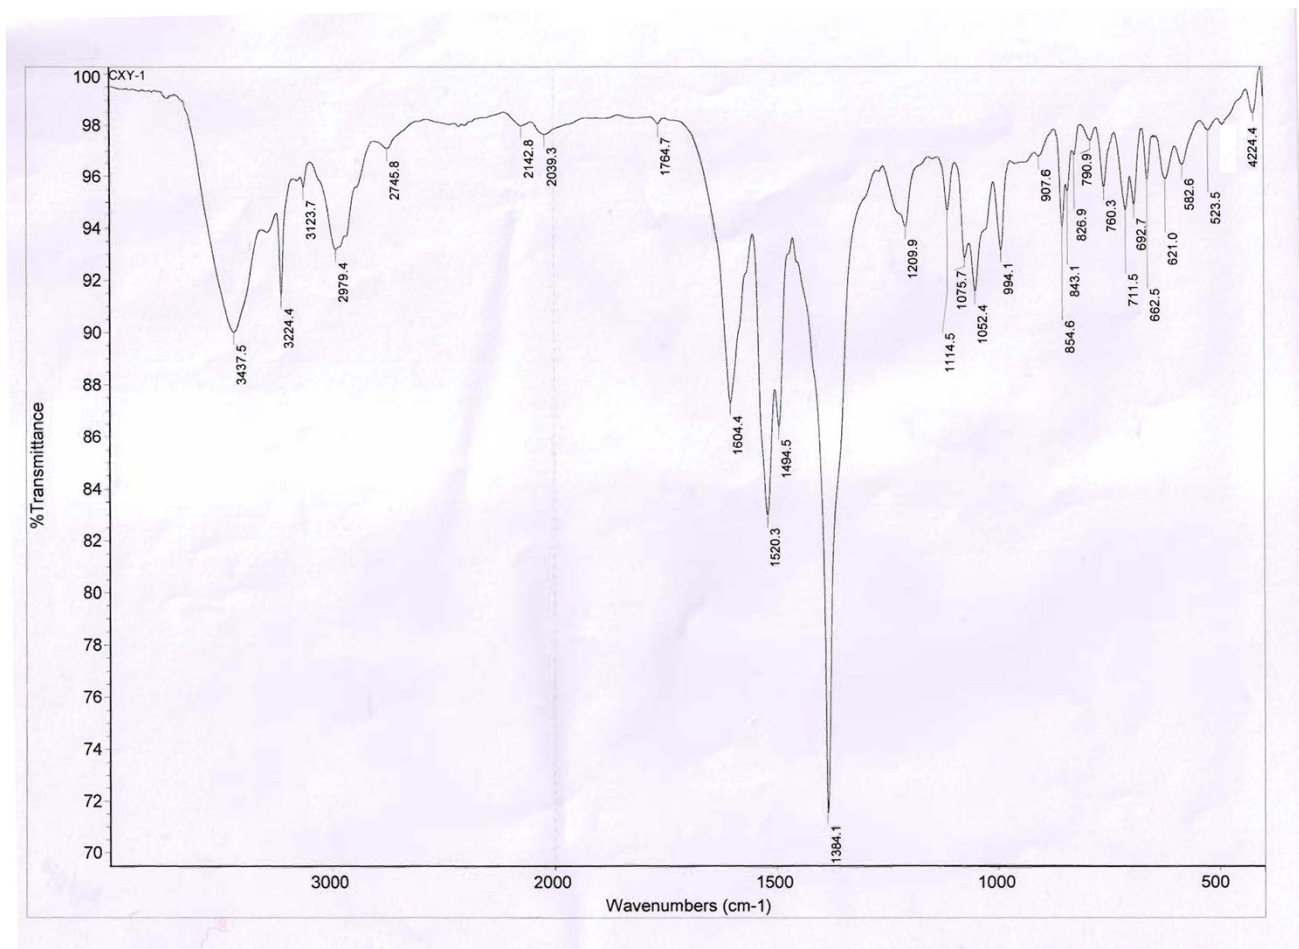

**Fig. S6.** The IR spectra of L- Al.
